# 1 **Heterogeneous ‘cell types’ can improve performance of deep** 2 **neural networks**

3 Briar Doty<sup>1</sup>, Stefan Mihalas<sup>1</sup>, Anton Arkhipov<sup>1</sup>, Alex Piet<sup>1</sup>

4 1. Allen Institute, Mindscope Program, Seattle, WA, USA.

5 Correspondence should be addressed to [alex.piet@alleninstitute.org](mailto:alex.piet@alleninstitute.org)

## 6 **Abstract**

7 Deep convolutional neural networks (CNNs) are powerful computational tools for a large variety of tasks  
8 (Goodfellow, 2016). Their architecture, composed of layers of repeated identical neural units, draws  
9 inspiration from visual neuroscience. However, biological circuits contain a myriad of additional details  
10 and complexity not translated to CNNs, including diverse neural cell types (Tasic, 2018). Many possible  
11 roles for neural cell types have been proposed, including: learning, stabilizing excitation and inhibition,  
12 and diverse normalization (Marblestone, 2016; Gouwens, 2019). Here we investigate whether neural cell  
13 types, instantiated as diverse activation functions in CNNs, can assist in the feed-forward computational  
14 abilities of neural circuits. Our heterogeneous cell type networks mix multiple activation functions within  
15 each activation layer. We assess the value of mixed activation functions by comparing image  
16 classification performance to that of homogeneous control networks with only one activation function per  
17 network. We observe that mixing activation functions can improve the image classification abilities of  
18 CNNs. Importantly, we find larger improvements when the activation functions are more diverse, and in  
19 more constrained networks. Our results suggest a feed-forward computational role for diverse cell types  
20 in biological circuits. Additionally, our results open new avenues for the development of more powerful  
21 CNNs.

## 22 **Introduction**

23 Deep convolutional neural networks (CNNs) draw architectural inspiration from visual neuroscience.  
24 CNNs contain many processing units that aim to emulate the role of neurons in the mammalian visual  
25 system, a series of iterative processing steps (Goodfellow, 2016, Hubel & Wiesel, 1959; Hubel & Wiesel,  
26 1962). Recently performance of CNNs has rapidly improved across a wide range of computational tasks,  
27 particularly visual object recognition and classification (LeCun et. al., 2015). CNNs work by developing  
28 highly nonlinear representations of inputs across repeated layers of processing units. These  
29 representations are learned through training by updating the connections, or weights, between units in  
30 successive layers. Types of processing layers include convolutional layers, which convolve input with  
31 learned spatial filters, activation layers which include a nonlinear activation function, and max-pooling

32 layers. Typically, CNNs units are uniform across each layer within a network. Network  
33 architectures—meaning the number, size, type, and arrangement of processing unit layers—are often  
34 manually designed through iterative experimentation, although automated search techniques are being  
35 actively developed (Zoph & Le, 2016). Individual convolutional features and weights are determined  
36 through iterative training, not architectural design.

37 Biological circuits, however, contain diverse cell types at each location in the visual hierarchy.  
38 Classification of neural cell types dates back to the pioneering work of Ramon y Cajal, who described in  
39 fine detail elaborate neural morphology (Llinas, 2003). Recent studies have classified neurons by their  
40 location in the brain, morphology, gene transcription, and electrical properties (Tasic, 2018; Teeter, 2018;  
41 Gouwens, 2019; Gouwens, 2020). The biological function of these diverse neural cell types is not yet  
42 fully understood, but is an active area of research (Burnham, 2021; Zeldenrust, 2021; Perez-Nieves,  
43 2021). Many possible roles for neural cell types have been proposed, including: learning, stabilizing  
44 excitation and inhibition, and diverse normalization (Marblestone, 2016; Gouwens, 2019). Recently  
45 several studies have begun to investigate computational properties of networks with heterogeneous cell  
46 types, instantiated in different ways such as excitatory vs inhibitory (Cornford, 2020), synapses  
47 (Burnham, 2021), connectivity (Stöckl, 2021), and intrinsic dynamics (Padmanabhan, 2010; Gjorgjieva,  
48 2016; Duarte, 2019; Perez-Nieves, 2021; Zeldenrust, 2021). Broadly, these studies find computational  
49 benefits from adding heterogeneity to neurons. Burnham et al, 2021 and Perez-Nieves et al, 2021  
50 investigated adding heterogeneous synaptic and membrane timescales, finding improved performance on  
51 standardized sequential datasets. Stöckl et al, 2021 constructed networks with cell type specific  
52 connectivity rules, and found improved performance with reduced number of neurons. Zeldenrust et al,  
53 2021 analytically derived a class of spiking network models that optimally track time-varying inputs,  
54 resulting in networks with diverse internal dynamics. We build on these results by instantiating cell type  
55 diversity as mixed activation functions, and explore the possible role for neural heterogeneity in  
56 feed-forward computation in CNNs performing image classification.

57 One basic classification of neurons uses their electrical input-output relationships characterizing them  
58 electrophysiologically based on features of their  $f-I$  curves—nonlinear functions that map input current to  
59 neuronal firing rate (Izhikevich, 2007). In the deep learning context, neurons are reduced to units  
60 represented by a single, 1-dimensional quantity: their activation function. Activation functions are  
61 typically nonlinear functions that transform the weighted sum of a unit's input to an output value. Taking  
62 advantage of this similarity between activation functions and  $f-I$  curves, we can designate different CNN  
63 unit cell types by applying mixed activation functions as an analog for electrophysiological classification.

64 Applying these constraints in the deep learning context presents an opportunity to use CNNs as a model  
65 for studying the role that heterogeneous cell types might play in feed-forward sensory coding. Here we  
66 investigate the effects of adding mixed activation functions as an analog for cell types to an existing CNN  
67 architecture. To constrain our investigation we did not explore heterogeneous connectivity (Stöckl, 2021),  
68 synapses (Burnham, 2021), timescales (Burnham, 2021 and Perez-Nieves, 2021), or spike-timing  
69 (Zeldenrust, 2021). We seek to characterize the network response to the addition of cell types in terms of  
70 classification accuracy, learning, and the network’s internal representation of the input space. We find that  
71 mixed activation functions can improve image classification compared to control homogeneous networks,  
72 and that the benefit of mixed activation functions is larger in more constrained networks. Finally, we find  
73 that internal representations in mixed networks differ from the control networks.

## 74 **Results**

75 **Mixed activation functions on an image classification task.** To investigate the role of heterogeneous  
76 cell types in feed-forward processing, we implemented a programmatic framework that generates CNN  
77 instances containing heterogeneous configurations of activation functions, then trains them on an image  
78 classification task. We adopted the CIFAR-10 image set as our primary classification benchmark. This  
79 imageset contains 10 image classes with 6000 exemplars in each class (Krizhevsky, 2009). As a standard  
80 network testbed we used the popular, relatively simple, VGG11 architecture (Simonyan & Zisserman,  
81 2014). VGG11 contains 11 composite layers including 8 convolutional layers and 3 fully connected  
82 layers. We started experimentation with VGG11 because its uniform architecture across layers allows for  
83 straightforward analysis and modification, its popularity means its performance is well-studied on popular  
84 datasets, and its depth offers the ability to attain state of the art classification accuracy.

85 We replaced the homogeneous activation functions (Figure 1a) in VGG11 to introduce heterogeneity  
86 (Figure 1b). In particular, each mixed network contains two activation functions within every activation  
87 layer and fully connected layer. We refer to a network configuration that mixes activation functions A and  
88 B with a name of the form “mixed A-B” (Figure 1b), and a homogeneous control network that uses only  
89 A or B as “control A” or “control B” (Figure 1a). Note that our mixed networks contain the same number  
90 of units, connections, and learnable parameters as the control networks. For each mixed or control  
91 configuration, we trained 10 initializations of the same network architecture with random starting  
92 weights. This approach allows us to statistically assess whether mixed activation functions improve image  
93 classification ability. For example, comparing the control networks Swish(7.5), and PTanh(1) (Figure 1c),  
94 with the corresponding mixed network Swish(7.5)-PTanh(1), we find the mixed network outperforms  
95 both the linear average of the two control networks, and each control network individually (Figure 1d).

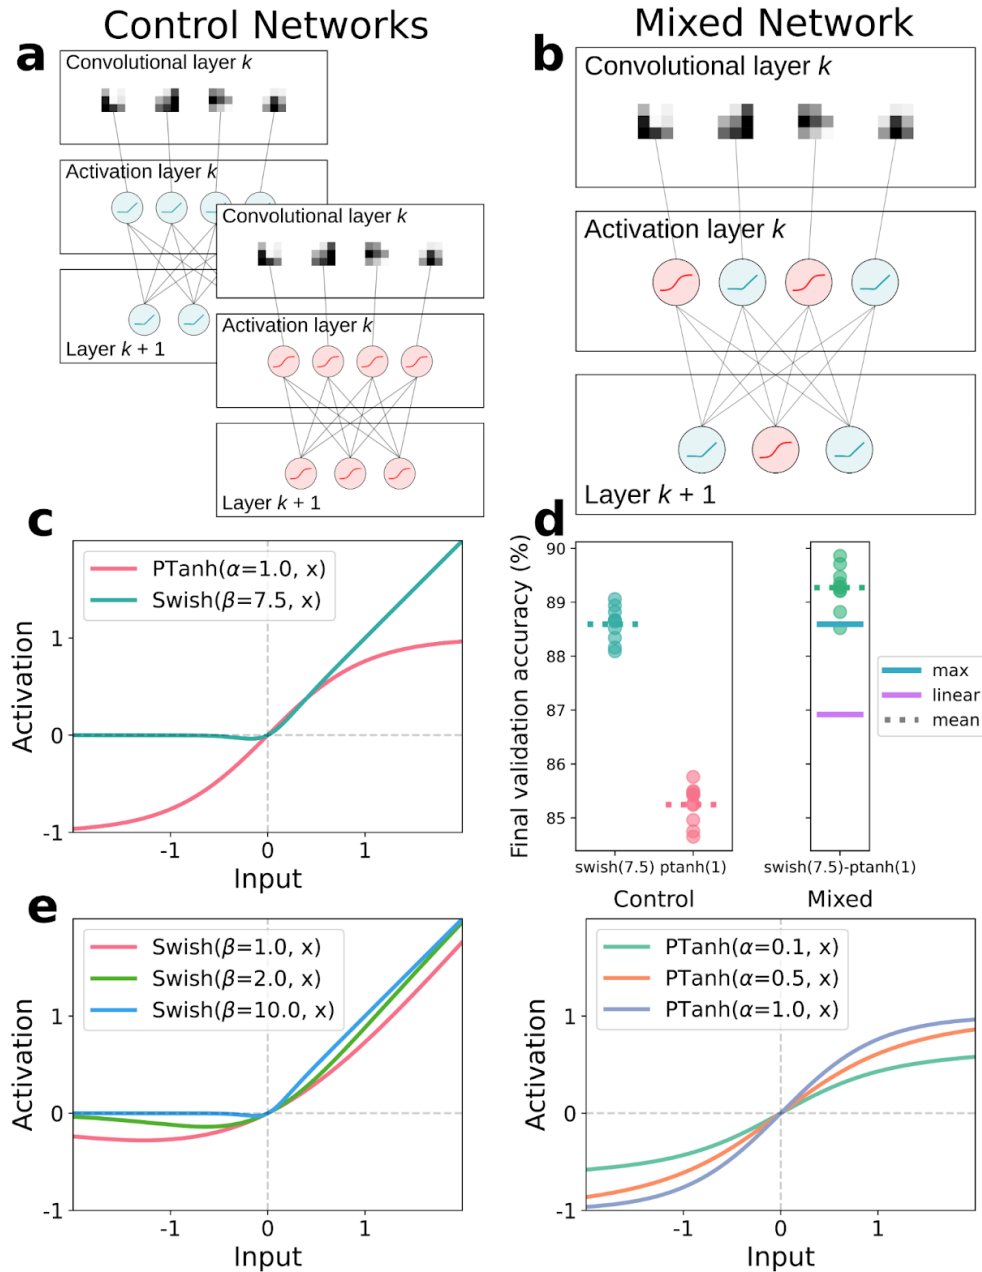

96 **Figure 1.** (a) Homogeneous control networks corresponding to the mixed network in (b). Each control network  
 97 contains only one activation function across all units. (b) Illustration of mixed activation functions within a  
 98 CNN. PTanh and Swish units are intermixed within each activation and fully connected layer in the network. (c)  
 99 PTanh and Swish nonlinear activation functions. PTanh is saturating, while Swish has rectification properties.  
 100 (d) Comparison of final classification accuracies for a heterogeneous configuration of VGG11 and its  
 101 corresponding control networks. For each network type, each dot represents the final accuracy of a single  
 102 random initialization, and the dashed line is the mean accuracy across initializations. The max prediction is the  
 103 greater of the two control cases, while the linear prediction is the average of the two control cases. Here the  
 104 mixed network outperforms both predictions. (e) Examples of Swish and PTanh nonlinearities over a range of  
 105 parameter values.

106 **Search space.** To keep the scope of the investigation practical, we defined a search space that balances  
107 dynamic range of effect with the feasibility of exploration. The dimensions of this space include the set of  
108 candidate activation functions and their associated parameters, the ten targetable activation layers in  
109 VGG11, and the set of locations within the targeted layers at which activation functions can be applied.  
110 Since an exhaustive exploration of all possible permutations of even a small set of activation functions in  
111 a single layer is not feasible, we set out to target all activation layers with systematic cell type  
112 arrangements that offer a good sampling of the overall search space. Our results presented here used a 1:1  
113 ratio of two activation functions within each layer of each network.

114 **Families of parametric activation functions.** The choice of activation functions in artificial deep  
115 networks is an active area of research (Ramachandran et. al., 2017). Different activation functions have  
116 been historically used in deep learning with different motivations (Goodfellow et. al., 2016). We  
117 separated activation functions into different families that exhibit the qualitatively different behaviors of  
118 rectification and saturation (Figure 1c). Commonly used members of each family are thought to offer  
119 different advantages in deep neural networks. For example, rectifying functions like ReLU are often  
120 piecewise linear, and are thought to help the network develop a sparse internal representation of the input  
121 space. Saturating activation functions like Tanh operate with bounded outputs at input extremes. And a  
122 non-monotonic activation function like Swish offers behavior that is mostly rectifying, while maintaining  
123 continuous differentiability. We reasoned that mixed activation functions might offer computational  
124 benefits by combining the diverse advantages of different function families. We chose the parametric  
125 activation function Swish to represent the rectifying family (eq. 1), and the saturating activation function  
126 PTanh of our own design to represent the saturating family (eq. 2).

$$\text{Eq. 1 } \text{Swish}(\beta, x) = \frac{x}{1 + e^{-\beta x}}$$

$$\text{Eq. 2 } \text{PTanh}(\alpha, x) = \frac{\tanh(x) + \tanh(\alpha x)}{2}$$

127 In addition to mixing across function families, we can evaluate the benefits of mixing within a function  
128 family by changing the function hyper-parameters  $\beta$  and  $\alpha$ . Over a range of parameters, a single  
129 nonlinearity like Swish or PTanh can take a variety of forms (Figure 1e). PTanh has a parameter  $\alpha$  that  
130 changes the curvature of the activation function such that the network cannot compensate by scaling the  
131 input weights. As the Swish parameter  $\beta$  increases, the function displays increasing rectification,  
132 becoming more similar to ReLU. Here we explore mixing cell types both “within” function families: the  
133 same function with a different parameter value, and “across” function families: different functions with  
134 potentially different parameter values.

135 **Accuracy relative to linear and max prediction.** To evaluate the role of mixed activation functions, the  
136 performance of a given mixed network is compared to that of its corresponding homogeneous control  
137 networks using two metrics: the mixed network's linear and max prediction (Figure 1d). The linear  
138 prediction expects the mixed network to perform as well as a linear combination of its control network  
139 accuracies. Our mixed networks use a 1:1 ratio of two activation functions, so the linear prediction is  
140 simply the average of the two control accuracies. For example, the control networks Swish( $\beta=7.5$ ) and  
141 PTanh( $\alpha=1$ ) have mean final accuracies 88.59% and 85.24%, therefore the linear prediction for mixed  
142 network Swish( $\beta=7.5$ )-PTanh( $\alpha=1$ ) is 86.92%. Note here that the mean final accuracy for both the  
143 homogeneous control networks and the mixed networks is the average over 10 random initializations of  
144 each network type. The max prediction accounts for the possibility that a mixed network learns to  
145 compensate for the introduction of a population of units with a nonlinearity that performs poorly by  
146 adjusting its weights to "ignore" those units, thereby inaccurately inflating the mixed net's performance  
147 with respect to its linear prediction. The max prediction is resistant to this effect. It expects the mixed  
148 network to perform as well as the best of its control network accuracies. For example, given the same  
149 control network accuracies presented above, the max prediction for mixed network Swish(7.5)-PTanh(1)  
150 is 88.59%. Figure 1d shows results for Swish(7.5)-PTanh(1), with mean final accuracy of 89.27%,  
151 outperforms both the maximum and linear prediction of its control networks. Our primary investigation  
152 aims to uncover under what conditions mixed activation function networks can outperform the max  
153 prediction of their control networks.

154 **Diverse heterogeneous networks outperform homogeneous control networks.** Using the VGG11  
155 architecture, we applied heterogeneous configurations within and across the parametric spaces of Swish  
156 and PTanh nonlinearities, then compared the final validation accuracies attained by each configuration on  
157 CIFAR-10 to the linear and max prediction based on each configuration's corresponding homogeneous  
158 control networks. We observe that cross-family networks and within-family networks composed of  
159 diverse nonlinearities frequently beat their linear predictions (34 out of 35 cross-family and 21 out of 31  
160 within-family using VGG11). However, when we hold the same network configurations to the higher  
161 standard of the max prediction (see example in Figure 1d), network performance relative to the control  
162 networks significantly depends on the choice of activation function parameters.

163 Using the max prediction benchmark, 6 out of 35 cross-family heterogeneous configurations impart an  
164 improvement in image classification accuracy to VGG11 that is statistically significant after adjusting for  
165 multiple comparisons (Figure 2a, note that this panel excludes networks containing nonlinearities  
166 Swish( $\beta=0.1$ ) and PTanh( $\alpha=0.01$ ) for visual clarity). We refer to a network that beats its max prediction as



167 exhibiting a positive response to mixed activation function. The largest positive response is that of  
168 Swish(7.5)-PTanh(1), which beats its max prediction by 0.7% on average. The magnitude of this effect  
169 corresponds to around 70 additional correct image classifications in CIFAR-10's test set that neither  
170 control network configurations Swish(7.5) or PTanh(1) was able to correctly classify on average. The  
171 mean validation accuracy relative to max prediction for cross-family configurations of VGG11 is +0.04%  
172 (Figure 2b), and +0.79% relative to the linear prediction (Figure 2c). VGG11's cross-family parameter  
173 landscape is relatively smooth, with a clear preference for higher Swish  $\beta$  values (Figure 2d). Specifically,  
174 we find configurations that mix PTanh( $\alpha$ ) with Swish( $\beta$ ) functions using higher  $\beta$  values exhibit the  
175 largest increase in accuracy, and the highest final accuracy overall (Figure 2d). However, we see a less  
176 clear preference for PTanh's  $\alpha$  values. It is worth noting that as Swish's  $\beta$  increases, the Swish function  
177 has stronger rectification and the activation profile more closely approximates that of ReLU (Figure 1e).  
178 These results demonstrate that heterogeneous activation functions can improve image classification.

179 Within-family heterogeneous configurations of VGG11 rarely outperform their max predictions (Figure  
180 2b)—none of the 31 such configurations explored beat their max prediction with statistical significance.  
181 This demonstrates that the benefit of mixed activation functions may arise from utilizing the diverse  
182 characteristics of activation function families, such as saturation and rectification.

183 **Sticknet8—a reduced-parameter CNN.** Between its filters, biases, and weights, VGG11 contains over  
184 120 million trainable parameters. Additionally, since VGG11 has been demonstrated to achieve over 90%  
185 testing accuracy on CIFAR-10 (Fu 2019), there remains less than 10% left for potential improvement  
186 beyond that as a result of the addition of heterogeneous activation functions. Motivated by the factors  
187 above, we reasoned that more significant improvements may be readily observable in a network more  
188 constrained than VGG11. Therefore we set out to investigate the effects of adding mixed cell types to  
189 Sticknet8—a CNN which we describe here, based on the VGG11 architecture, but with approximately  
190 1000 times fewer parameters. Sticknet8 joins the first 2 convolutional layers from VGG11 with VGG11's  
191 final 3 fully-connected layers, while significantly reducing the number of parameters per layer. It  
192 preserves aspects of VGG11's architecture including its 3x3 convolutional filters, its repeated groups of  
193 convolutional, activation, and pooling layers, and its relative layer-to-layer increases in parameters, but  
194 reduces the number of filters in the first convolutional layer from 64 to just 8. These changes result in a  
195 reduction from VGG11's 128 million parameters down to Sticknet8's 119,000. Using Sticknet8 as a base  
196 architecture, we repeated the experiments performed on VGG11 with the same set of heterogeneous  
197 network configurations.

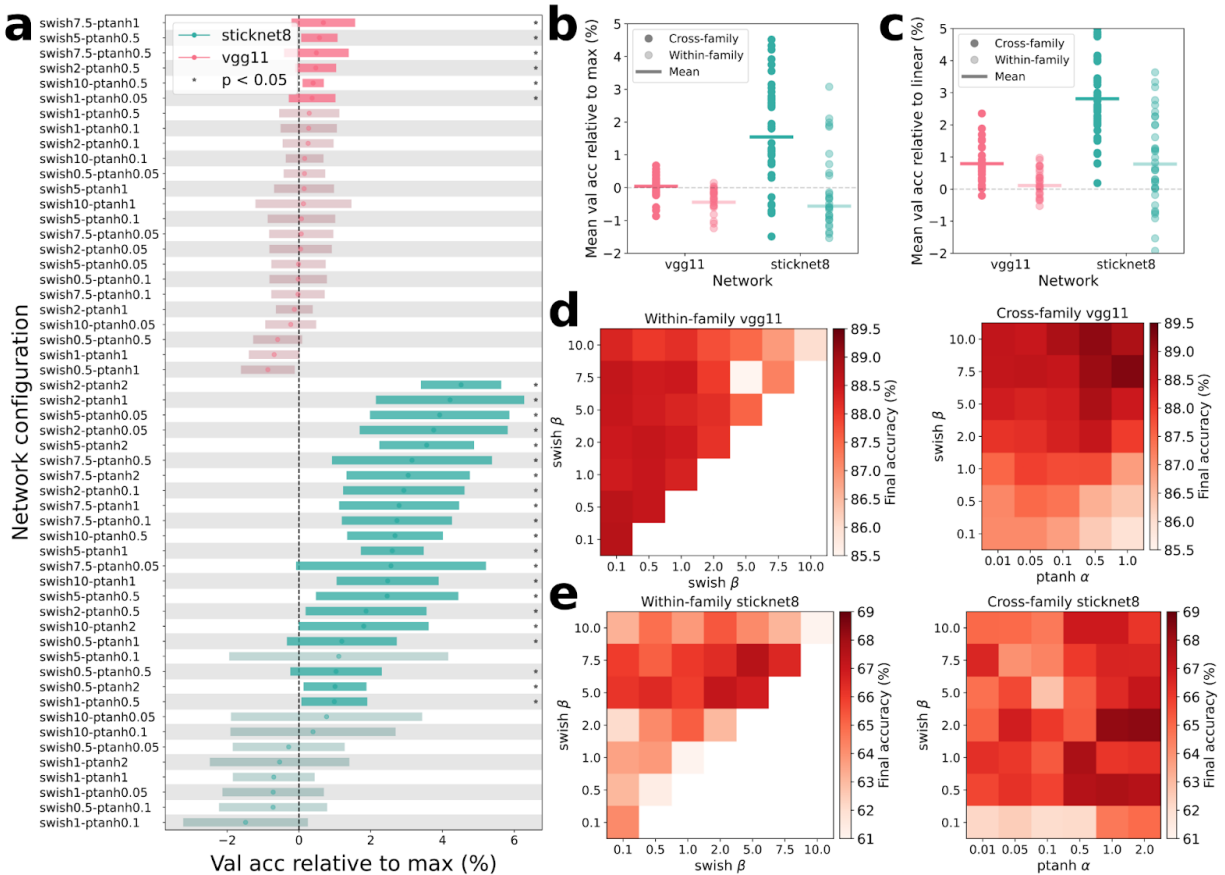

198 **Figure 2. Mixed activation functions improve image classification performance.** (a) Summary of mixed  
 199 network accuracy relative to max prediction compared to control networks for VGG11 (red) and Sticknet8 (teal)  
 200 architectures. Only cross-family networks are shown for clarity. Error bars represent a 95% confidence interval  
 201 across 10 independently trained random initializations. Stars and darker shading indicate significant  
 202 improvement of mixed network performance over control networks (one-sided t-test,  $p < 0.05$  after  
 203 Benjamini-Hochberg correction for multiple comparisons). Networks containing nonlinearities Swish( $\beta=0.1$ )  
 204 and PTanh( $\alpha=0.01$ ) excluded for visual clarity (present in remaining panels). (b) Comparison of mean peak  
 205 accuracy relative to max prediction for cross- and within-family mixed network configurations of VGG11 (only  
 206 significant networks included). (c) Same as (b) using linear prediction. Notably, both cross- and within-family  
 207 mixed networks beat their linear predictions on average for both network architectures. (d) Peak accuracy  
 208 parameter landscapes for within-family Swish networks (left) and cross-family networks (right) for VGG11  
 209 architecture. (e) Same as (d) using Sticknet8 architecture.

210 **Sticknet8 offers more pronounced benefits of mixed activation functions.** As expected, the CIFAR-10  
 211 final validation accuracies for Sticknet8 are generally lower than they are for the less constrained VGG11.  
 212 The best configurations of Sticknet8 attain peak accuracies around 68% or lower (Figure 2e). However,  
 213 the positive responses to the addition of cross-family mixed nonlinearities are both more frequent across  
 214 explored network configurations (Figure 2a) and more pronounced within each configuration for  
 215 Sticknet8 than for VGG11 (Figure 2b), supporting our expectation that improvements would be more



216 readily observable in a parameter-constrained network that operates in a lower peak accuracy regime of  
217 CIFAR-10 than VGG11. Consistent with VGG11, the max prediction is a higher standard than the linear  
218 prediction, and cross-family networks outperform within-family networks. Compared to the linear  
219 prediction, 42 out of 42 cross-family, and 27 out of 36 within-family configurations outperform the linear  
220 prediction. Using the max prediction benchmark, 21 of the 42 cross-family configurations of Sticknet8  
221 exhibit a positive response to the introduction of mixed nonlinearities (Figure 2a, note again some  
222 network configurations excluded from figure for visual clarity), and 3 out of 36 within-family  
223 configurations outperformed their max predictions.

224 While the effects in Sticknet8 hold over a larger landscape of parameter values, the performance is less  
225 sharply dependent on specific parameter values (Figure 2e). Interestingly, the best performing parameter  
226 combinations differ between Sticknet8 and VGG11, with Sticknet8 achieving the best performance with  
227 smaller values of Swish's  $\beta$  compared to VGG11 (Figure 2d,e). Notably, several mixed configurations  
228 that negatively impacted the performance of VGG11 are among the top performing configurations of  
229 Sticknet8 (Figure 2a): Swish(2)-PTanh(1), Swish(5)-PTanh(0.05), and Swish(2)-PTanh(0.05). These three  
230 configurations beat their max predictions by almost 4%.

231 Our results with Sticknet8 demonstrate the computational advantages of mixed activation functions are  
232 more pronounced in a more constrained network, with mixed activation configurations beating their max  
233 predictions both more frequently and with larger magnitudes. As with VGG11, we observe the largest  
234 benefit from mixing across activation function families.

235 **Activation functions alter dimensionality of network responses.** To gain insight into when and how  
236 mixed activation functions improve classification accuracy, we measured the dimensionality of network  
237 activations within each layer in response to a stratified subset of 500 CIFAR-10 images. We measured  
238 dimensionality using the participation ratio. The participation ratio measures the dimensionality as the  
239 square of the sum of the covariance matrix of unit activation eigenvalues over the sum of the squared  
240 eigenvalues (Recanatesi, 2019a; Recanatesi, 2019b; Gao, 2017; Rajan, 2010):

241 
$$\text{Dim}(\mathbf{C}) = \frac{(\sum_i \lambda_i)^2}{\sum_i \lambda_i^2} .$$

242 We adopted the participation ratio because it is simple to compute and interpret.

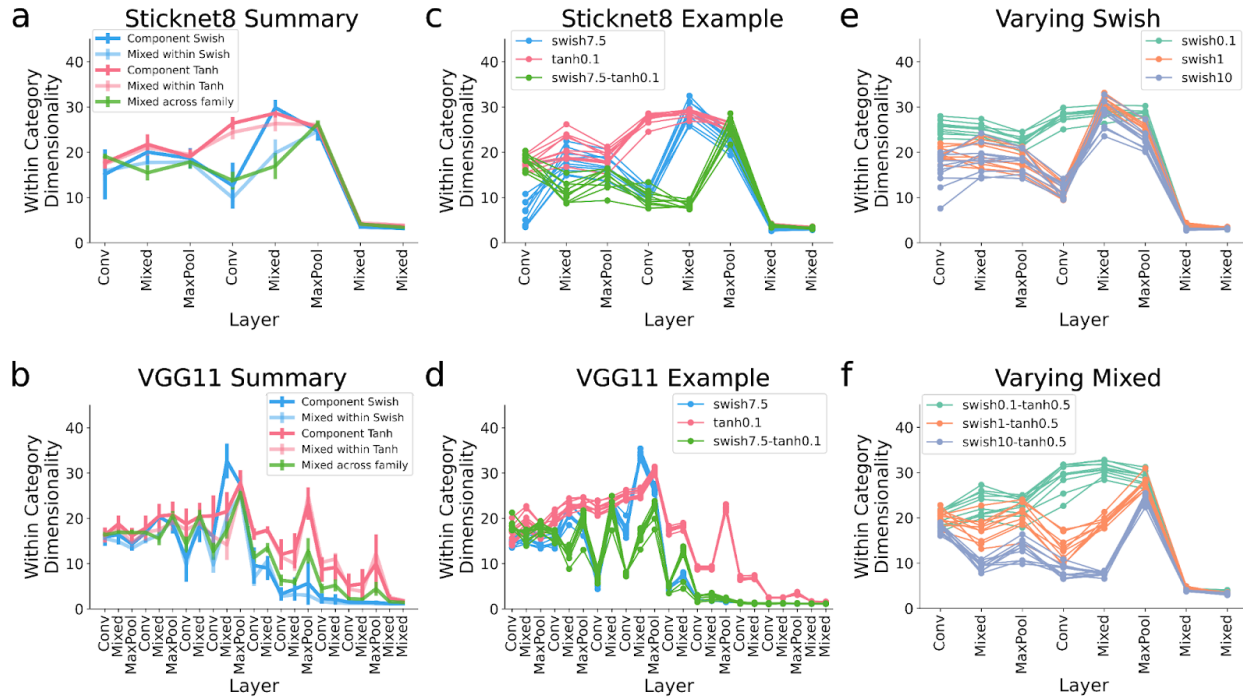

243 **Figure 3. Different activation functions change the dimensionality of internal representations. (a)** The average  
 244 dimensionality of the response to each image category (within category dimensionality) for different classes of  
 245 Sticknet8 networks (mean  $\pm$  95% CI). **(b)** Same as (a) for VGG11 networks. **(c)** Dimensionality across layers for an  
 246 example Sticknet8 mixed network and its control networks (colors). Each network has 10 random initializations  
 247 (lines). **(d)** Same as (c) for VGG11. **(e)** Dimensionality across three swish control networks with different parameter  
 248 values. **(f)** Dimensionality across three cross-family mixed networks, varying the swish parameter, and fixing the  
 249 tanh parameter.

250 We find in both Sticknet8 and VGG11 that changing the activation function dramatically alters the  
 251 dimensionality of network activations within each layer (Figure 3a,b). Consistent with previous findings  
 252 (Recanatesi, 2019a), in both Sticknet8 and VGG11 we find dimensionality generally increases moving  
 253 deeper into the network before decreasing in the final layers (Figure 3a,b). Additionally, in both  
 254 architectures, the dimensionality was largely consistent across the 10 initializations of each network  
 255 configuration, with consistency increasing in deeper layers (Figure 3c,d). The relationship between  
 256 activation functions and dimensionality within each layer appears complex. As a demonstration, Figure 3  
 257 shows the dimensionality of several example network configurations. Mixed networks generally  
 258 displayed dimensionalities that differed from their control networks, and did not appear to follow a linear  
 259 relationship (Figure 3c,d). The dimensionality responds nonlinearly to smooth variation of the activation  
 260 function parameter (Figure 3e). In a mixed network configuration smoothly varying the parameter of one  
 261 activation function in the presence of a constant second activation function resulted in large changes in

262 dimensionality (Figure 3f). For example in Figure 3, comparing each Swish() control network in Figure  
263 3e with the corresponding mixed network in Figure 3f, we find the layer with the largest dimensionality  
264 shifts to a deeper layer. In the case of Sticknet8, cross-family networks and within-family Swish  
265 networks—but not within-family PTanh networks—displayed smaller dimensionality throughout layers  
266 than control networks on average (Figure 3a). We did not observe this pattern in VGG11 (Figure 3b). This  
267 discrepancy may underlie the increased benefit of mixed activation functions in Sticknet8 compared to  
268 VGG11. In summary, we find that modifying activation functions can dramatically alter the internal  
269 representations of deep convolutional networks.

## 270 **Discussion**

271 Our results show that the addition of heterogeneous activation functions to deep networks can improve  
272 image classification accuracy compared to the corresponding control activation functions independently.  
273 Mixing activation functions across Swish and PTanh families had a larger benefit than within either  
274 family alone. We found larger improvements from mixed activation functions in a more constrained  
275 network. The dimensionality of the internal representation varied greatly depending on the choice of  
276 activation functions.

277 In this study we instantiated neural cell types by their activation functions, as a simplification of the  $f-I$   
278 curves used to classify neurons, typically into “Type 1” and “Type 2” excitability. These types differ in  
279 how abruptly their  $f-I$  curves change in response to increase input current. Interestingly, one recent study  
280 found that “Type 1” and “Type 2” excitable neurons make spike timing networks more robust to  
281 correlated noise (Zeldenrust, 2021). Our findings suggest that diverse  $f-I$  curves may offer feed-forward  
282 computational benefits. However, some neurons exhibit nonlinear dynamics in their dendrites that are not  
283 effectively summarized by the  $f-I$  curve, underscoring that activation functions are an approximation of  
284 single neuron dynamics. Emerging work modeling dendritic computation (Beniaguev, 2019; Gidon, 2020)  
285 has parallels to network-in-network approaches in deep learning (Lin, 2013; Manessi, 2019). Beyond  
286 dynamical properties, there are many other attributes of neural diversity that are not commonly translated  
287 to deep learning, such as cell type specific sensory inputs, excitatory vs inhibitory neurons, and  
288 neuromodulation. Our findings join recent studies exploring the computational benefits of neural  
289 diversity, such as cell type specific connectivity (Stöckl, 2021), synaptic timescales (Burnham, 2021;  
290 Perez-Nieves, 2021), and membrane timescales (Perez-Nieves, 2021). Determining the functional role of  
291 neural cell types is an active area of research, and many of these cell type attributes may have  
292 translational benefit to deep learning applications.

293 An alternative approach to adding heterogeneity to network activation functions is to parameterize and  
294 learn the activation function parameters for each unit in the network. This parametric approach has been  
295 used with ReLU (He, 2015; Balaji, 2019), a set of basis functions (Goyal, 202), and piecewise linear  
296 functions (Agostinelli, 2015). Learning the activation function parameters has the benefit of increased  
297 flexibility at the cost of additional parameters, and choices about the parametric form of the activation  
298 functions. We find the largest benefit from mixing across parametric families of activation functions,  
299 demonstrating a distinct benefit beyond existing parametric approaches.

300 These findings raise an intriguing question: how do diverse nonlinearities impart improvements in  
301 feed-forward processing? One possibility is that mixed activation functions serve as more diverse basis  
302 functions within each layer, allowing increasingly complex transformations from one layer to another,  
303 increasing the overall expressivity of the network. A related possibility is that mixed activation functions  
304 balance the computational roles of sparsification and saturation across transformations of the network's  
305 internal representation of the input space. Future work should further investigate the underlying  
306 mechanisms of diverse nonlinearities by examining the internal representations in mixed versus  
307 non-mixed networks. The relationship between network performance and internal representations is an  
308 active field of study, and mixed activation functions may serve as a useful test case for future work.

309 Our study explored the simplest alternating configurations for mixed activation functions in a 1:1 ratio.  
310 Ideally, automatic search techniques could generalize our approach to find optimal combinations of  
311 multiple activation function families across different layers of deep networks. Additionally, we found the  
312 highest performing activation functions in VGG11 and Sticknet8 differed. This highlights the need for  
313 further research to understand which activation functions, and in which combinations, lead to the largest  
314 improvement in accuracy. Our finding that a more constrained network had a larger benefit from mixed  
315 cell types suggests that one may see larger benefits on more complex datasets. In addition, future work  
316 should explore the role of mixed activation functions in settings beyond image classification. Deep  
317 learning is rapidly being applied to many tasks, and our study is only an initial investigation into the role  
318 of diverse activation functions.

319 In summary, heterogeneous cell types are a striking feature of biological circuits, and notably absent in  
320 deep artificial neural networks. In this study we instantiated diverse cell types by diverse activation  
321 functions. While many possible roles for cell types have been proposed, here we demonstrate their benefit  
322 in feed-forward computation in deep convolutional networks. This finding opens a large number of future  
323 studies to examine the role of cell types in biological circuits, and as tools in machine learning.

## 324 **Methods**

325 **Network.** Our base network architecture is VGG11 (Simonyan & Zisserman, 2014). The Pytorch instance  
326 of VGG11 contains 11 composite layers, 8 convolutional layers and 3 fully-connected layers. Each  
327 convolutional layer consists of a series of 3x3 convolutional filters, a ReLU activation layer, and a  
328 pooling layer that is included following activation layers 1, 2, 4, 6, and 8. Each fully-connected layer  
329 consists of a series of units linearly connected to input features with weights and biases, followed by a  
330 ReLU activation layer and a dropout layer. VGG11 contains 128 million trainable parameters.

331 Additionally, we developed a smaller network we named Sticknet8. Sticknet8 takes the first two  
332 convolutional layers from VGG and grafts them onto VGG's final 3 fully-connected layers. Additionally,  
333 the number of units per layer decreased (Table 1). Sticknet8 contains 119,000 trainable parameters.

334 **Pytorch framework.** We trained networks using Pytorch (Paszke, 2019). Each network had either the  
335 VGG11 or Sticknet8 architecture with random initial weights. Each network configuration is described by  
336 the names of their control nonlinearities and their corresponding parameter values. We initialized 10  
337 instances of the base network with random weights, then replaced every ReLU layer with a  
338 MixedActivationLayer, alternating the control nonlinearities across each unit in the layer.

339 **Training dataset and procedure.** We trained our networks for image classification on the CIFAR-10  
340 dataset—a 10-class set of 32x32 pixel images with 6000 images per class, broken into 5000 training and  
341 1000 validation images (Krizhevsky, 2009). Networks are optimized for top-1 accuracy via cross-entropy  
342 loss using the training algorithm Adam, which picks the best learning rate per network parameter  
343 (Kingma, 2015). This counteracts effects observed when using stochastic gradient descent where a global  
344 learning rate can lead to different observed rates of change in loss depending on the choice of activation  
345 function. For each network configuration, 10 random initializations are trained independently to assess  
346 statistical significance, using the same optimal learning rate selected for each network configuration.  
347 VGG11 and Sticknet8 networks were trained without using a learning rate scheduler for 500 or 300  
348 epochs respectively.

| Layer        | VGG11              | Sticknet8          |
|--------------|--------------------|--------------------|
| Conv1        | 64 filters         | 8 filters          |
| Activation1  | 64 units           | 8 units            |
| MaxPool1     | Kernel=2, stride=2 | Kernel=2, stride=2 |
| Conv2        | 128 filters        | 16 filters         |
| Activation2  | 128 units          | 16 units           |
| MaxPool2     | Kernel=2, stride=2 | Kernel=2, stride=2 |
| Conv3        | 256 filters        | -                  |
| Activation3  | 256 units          | -                  |
| Conv4        | 256 filters        | -                  |
| Activation4  | 256 units          | -                  |
| MaxPool4     | Kernel=2, stride=2 | -                  |
| Conv5        | 512 filters        | -                  |
| Activation5  | 512 units          | -                  |
| Conv6        | 512 filters        | -                  |
| Activation6  | 512 units          | -                  |
| MaxPool6     | Kernel=2, stride=2 | -                  |
| Conv7        | 512 filters        | -                  |
| Activation7  | 512 units          | -                  |
| Conv8        | 512 filters        | -                  |
| Activation8  | 512 units          | -                  |
| MaxPool8     | Kernel=2, stride=2 | -                  |
| FC9          | 4096 units         | 128 units          |
| Activation9  | 4096 units         | 128 units          |
| FC10         | 4096 units         | 128 units          |
| Activation10 | 4096 units         | 128 units          |
| FC11         | 4096 units         | 128 units          |

349 **Table 1. Description of network architectures.**



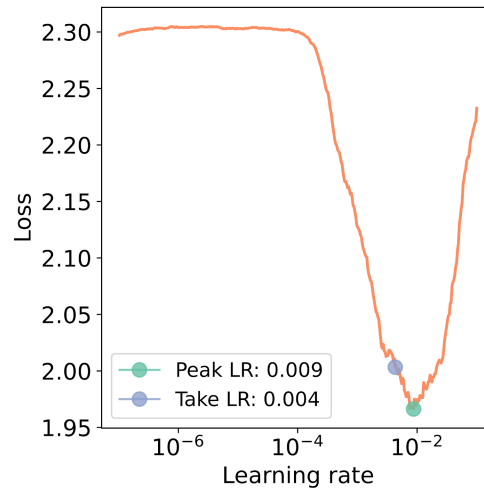

350 **Figure 4.** Learning rate vs. cross-entropy loss over a single training epoch. Lower learning rates fail to improve  
351 the loss, while higher learning rates cause it to diverge. The best value is somewhere on the negative slope  
352 between  $\sim 5e-4$  and  $1e-2$  (Smith 2015). We initialized (Take learning rate, blue dot) each network configuration  
353 with 50% of the maximum learning rate (Peak learning rate, green dot).

354 **Network training and initial learning rate selection.** Given that our networks contain mixtures of  
355 activation functions with different input/output scaling properties, it was important to use a training  
356 procedure that would optimize individual parameters at different learning rates. However, Adam - our  
357 optimizer (Kingma, 2015) - is sensitive to the initial global learning rate specified during instantiation. As  
358 with stochastic gradient descent, specifying too low an initial learning rate results in small updates to  
359 network parameters that fail to reduce the loss function over many training epochs, while specifying too  
360 high a learning rate prevents the optimizer from finding loss minima, leading to divergent behavior. This  
361 effect is particularly challenging in our case because a given network configuration can have its own  
362 optimum initial learning rate that if used to train other configurations can significantly hamper their  
363 learning, making comparisons of final accuracy less meaningful. Therefore we adopted a routine to  
364 choose the best initial learning rate per network configuration from a range of values based on loss  
365 recorded at each value (Smith 2015). The global learning rate is swept from low to high over the course of  
366 a single training epoch, stepping the learning rate and recording the loss after each minibatch. The best  
367 initial learning rate is then determined to be the highest value before loss starts to diverge, i.e. the lowest  
368 point of the LR-loss profile in Figure 4. This value is averaged across 10 network initializations per  
369 configuration, divided by 2 to account for variance in the LR-loss profile across initializations that might  
370 cause the routine to select too high a value, and given as input to the Adam optimizer at the start of  
371 training.

372 **Max and Linear Predictions.** For each mixed network, we define a maximum and linear prediction. For  
373 each corresponding control network, we compute the average validation accuracy across the 10 random  
374 initiations, and refer to this as the control accuracy. The maximum prediction is the maximum control  
375 accuracy across all corresponding control networks. The linear prediction is the weighted average  
376 between the corresponding control networks. Unless otherwise specified, our control networks were  
377 mixed in a 1:1 ratio, so the weighted average was a simple average. Where presented in the text, 95%  
378 confidence intervals were computed by assuming normally distributed variations across the 10 random  
379 initiations.

380 To establish statistical significance for our mixed networks compared to their control cases we utilized a  
381 1-sided t-test between control and mixed networks. Pairs of initializations from both groups were  
382 randomly selected. We corrected for multiple comparisons using the Benjamini-Hochberg correction to  
383 produce a corrected false-positive rate of  $p=0.05$ .

## 384 **References**

385 Agostinelli, F., Hoffman, M., Sadowski, P., Baldi, P. (2015) Learning activation functions to improve deep  
386 neural networks. arXiv:1412.6830v3 [cs.NE]

387 Balaji, S., Kavya, T., Sebastian, N. (2019) Learn-able parameter guided Activation Functions  
388 arXiv:1912.10752 [cs.LG]

389 Beniaguev, D., Segev, I., London, M. (2020) Single Cortical Neurons as Deep Artificial Neural Networks.  
390 bioRxiv 613141; doi: <https://doi.org/10.1101/613141>

391 Burnham, D., Shea-Brown, E., & Mihalas, S. (2021) Learning to Predict in Networks with Heterogeneous  
392 and Dynamic Synapses bioRxiv 2021.05.18.444107; doi: <https://doi.org/10.1101/2021.05.18.444107>

393 Cornford J., Kalajdzievski, D., Leite, M., Lamarquette, A., Kullmann, DM., Richards, B. (2020).  
394 Learning to live with Dale's principle: ANNs with separate excitatory and inhibitory units. bioRxiv  
395 2020.11.02.364968; doi: <https://doi.org/10.1101/2020.11.02.364968>

396 Dimsdale-Zucker, H. R., and Ranganath, C. "Representational similarity analyses: a practical guide for  
397 functional MRI applications." Handbook of Behavioral Neuroscience. Vol. 28. Elsevier, 2018. 509-525.

398 Duarte R, Morrison A (2019) Leveraging heterogeneity for neural computation with fading memory in  
399 layer 2/3 cortical microcircuits. PLOS Computational Biology 15(4): e1006781.  
400 <https://doi.org/10.1371/journal.pcbi.1006781>

401 Fu, CY. <https://github.com/chengyangfu/pytorch-vgg-cifar10>, 2019.

402 Peiran Gao, Eric Trautmann, Byron Yu, Gopal Santhanam, Stephen Ryu, Krishna Shenoy, Surya Ganguli.  
403 (2017) A theory of multineuronal dimensionality, dynamics and measurement. bioRxiv 214262; doi:  
404 <https://doi.org/10.1101/214262>

405 Gidon, A., Zolnik, TA., Fidzinski, P., Bolduan, F., Papoutsis, A., Poirazi, P., Holtkamp, M., Vida, I.,  
406 Larkum, ME. (2020) Dendritic action potentials and computation in human layer 2/3 cortical neurons.  
407 SCIENCE 03 JAN 2020 : 83-87

408 Gjorgjieva, J., Drion, G. & Marder, E. Computational implications of biophysical diversity and multiple  
409 timescales in neurons and synapses for circuit performance. Current Opinion in Neurobiology 37, 44–52  
410 (2016).

411 Goodfellow, I., Bengio, Y., Courville, A. Deep Learning, MIT Press, 2016.  
412 <http://www.deeplearningbook.org>

413 Gouwens NW, Sorensen SA, Berg J, Lee C, Jarsky T, Ting J, Sunkin SM, Feng D, Anastassiou CA,  
414 Barkan E, Bickley K, Blesie N, Braun T, Brouner K, Budzillo A, Caldejon S, Casper T, Castelli D, Chong  
415 P, Crichton K, Cuhaciyian C, Daigle TL, Dalley R, Dee N, Desta T, Ding SL, Dingman S, Doperalski A,  
416 Dotson N, Egdorf T, Fisher M, de Frates RA, Garren E, Garwood M, Gary A, Gaudreault N, Godfrey K,  
417 Gorham M, Gu H, Habel C, Hadley K, Harrington J, Harris JA, Henry A, Hill D, Josephsen S, Kebede S,  
418 Kim L, Kroll M, Lee B, Lemon T, Link KE, Liu X, Long B, Mann R, McGraw M, Mihalas S, Mukora A,  
419 Murphy GJ, Ng L, Ngo K, Nguyen TN, Nicovich PR, Oldre A, Park D, Parry S, Perkins J, Potekhina L,  
420 Reid D, Robertson M, Sandman D, Schroedter M, Slaughterbeck C, Soler-Llavina G, Sulc J, Szafer A,  
421 Tasic B, Taskin N, Teeter C, Thatra N, Tung H, Wakeman W, Williams G, Young R, Zhou Z, Farrell C,  
422 Peng H, Hawrylycz MJ, Lein E, Ng L, Arkhipov A, Bernard A, Phillips JW, Zeng H, Koch C.  
423 Classification of electrophysiological and morphological neuron types in the mouse visual cortex. Nat  
424 Neurosci. 2019 Jul;22(7):1182-1195. doi: 10.1038/s41593-019-0417-0. Epub 2019 Jun 17. PMID:  
425 31209381; PMCID: PMC8078853.

426 Gouwens, NW., et al. (2020). Integrated Morphoelectric and Transcriptomic Classification of Cortical  
427 GABAergic Cells. Cell. 183(4), 935-953, <https://doi.org/10.1016/j.cell.2020.09.057>

428 Goyal, M., Goyal, R., Lall, B. (2020) Learning Activation Functions: A new paradigm for understanding  
429 Neural Networks. arXiv:1906.09529 [cs.LG]

430 He, K., Zhang, X., Ren, S., Sun, J. (2015) Delving Deep into Rectifiers: Surpassing Human-Level  
431 Performance on ImageNet Classification. arXiv:1502.01852v1 [cs.CV]

432 Hubel, D. H. & Wiesel, T. N. (1959). Receptive fields of single neurones in the cat's striate cortex. The  
433 Journal of Physiology, 148(3), 574-591.

- 434 Hubel, D. H, & Wiesel, T. N. (1962). Receptive fields, binocular interaction and functional architecture in  
435 the cat's visual cortex. *The Journal of Physiology*, 160(1), 106-154.
- 436 Izhikevich, EM., (2007) *Dynamical Systems in Neuroscience: The Geometry of Excitability and Bursting*,  
437 The MIT Press, DOI: <https://doi.org/10.7551/mitpress/2526.001.0001>
- 438 Kingma, D., & Ba, J. Adam: A Method for Stochastic Optimization, ICLR 2015.
- 439 Kriegeskorte, N., Mur, M., & Bandettini, P. (2008). Representational similarity analysis - connecting the  
440 branches of systems neuroscience. *Frontiers in Systems Neuroscience*, 2, 4.
- 441 Krizhevsky, Alex. (2009). *Learning Multiple Layers of Features from Tiny Images*. University of Toronto.
- 442 LeCun, Y., Bengio, Y., & Hinton, G. (2015). Deep learning. *Nature (London)*, 521(7553), 436-444.
- 443 Lin, M., Chen, Q., Yan, S. (2013). Network In Network. arXiv:1312.4400v3 [cs.NE]
- 444 Llinás RR. The contribution of Santiago Ramón y Cajal to functional neuroscience. *Nat Rev Neurosci*.  
445 2003 Jan;4(1):77-80. doi: 10.1038/nrn1011. PMID: 12511864.
- 446 Marblestone, AH., Wayne, G., Kording, KP. (2016) Toward an Integration of Deep Learning and  
447 Neuroscience. *Frontiers in Computational Neuroscience*. 10, 94, 1662-5188.  
448 DOI=10.3389/fncom.2016.00094
- 449 Manessi, F., Rozza., A. (2019) Learning combinations of activation functions. arXiv:1801.09403v3  
450 [cs.LG]
- 451 Padmanabhan, K., Urban, N. (2010) Intrinsic biophysical diversity decorrelates neuronal firing while  
452 increasing information content. *Nat Neurosci* 13, 1276–1282. <https://doi.org/10.1038/nn.2630>
- 453 Paszke, A., Gross, S., Massa, F., Lerer, A., Bradbury, J., Chanan, G., Killeen, T., Lin, Z., Gimelshein, N.,  
454 Antiga, L., Desmaison, A., Kopf, A., Yang, E., DeVito, Z., Raison, M., Tejani, A., Chilamkurthy, S.,  
455 Steiner, B., Fang, L., Bai, J., & Chintala, S. (2019) PyTorch: An Imperative Style, High-Performance  
456 Deep Learning Library. *Advances in Neural Information Processing Systems*. 32
- 457 Perez-Nieves,N., Leung, VCH., Dragotti, PL., Goodman, DFM., (2021) Neural heterogeneity promotes  
458 robust learning. <https://www.biorxiv.org/content/10.1101/2020.12.18.423468v3>
- 459 Ramachandran, P., Zoph, B., & Quoc VL. (2017). Searching for Activation Functions.  
460 <https://arxiv.org/abs/1710.05941>

- 461 Rajan, K., Abbott, L., & Sompolinsky, H. (2010). Inferring Stimulus Selectivity from the Spatial  
462 Structure of Neural Network Dynamics. *Advances in Neural Information Processing Systems* 23
- 463 Recanatesi, S., Farrell, M., Advani, M., Moore, T., Lajoie, G., & Shea-Brown, E. (2019a). Dimensionality  
464 compression and expansion in Deep Neural Networks. <https://arxiv.org/abs/1906.00443>
- 465 Recanatesi, S., Ocker, G. K., Buice, M. A., & Shea-Brown, E. (2019b). Dimensionality in recurrent  
466 spiking networks: Global trends in activity and local origins in connectivity. *PLoS computational biology*,  
467 *15*(7), e1006446. <https://doi.org/10.1371/journal.pcbi.1006446>
- 468 Simonyan, Karen, & Zisserman, Andrew. (2014). Very Deep Convolutional Networks for Large-Scale  
469 Image Recognition. <https://arxiv.org/abs/1409.1556>
- 470 Smith, LN. (2017) Cyclical Learning Rates for Training Neural Networks. *IEEE Winter Conference on*  
471 *Applications of Computer Vision (WACV)*, pp. 464-472, doi: 10.1109/WACV.2017.58.
- 472 Stöckl, C., Lang, D., Maass, W. (2021) Probabilistic skeletons endow brain-like neural networks with  
473 innate computing capabilities. <https://www.biorxiv.org/content/10.1101/2021.05.18.444689v1>
- 474 Tasic, B., Yao, Z., Graybiel, L.T. et al. (2018) Shared and distinct transcriptomic cell types across  
475 neocortical areas. *Nature* 563, 72–78 . <https://doi.org/10.1038/s41586-018-0654-5>
- 476 Teeter, C., Iyer, R., Menon, V., Gouwens, N., Feng, D., Berg, J., Szafer, A., Cain, N., Zeng, H.,  
477 Hawrylycz, M., Koch, C., & Mihalas, S. (2018) Generalized leaky integrate-and-fire models classify  
478 multiple neuron types. *Nature communications*, 9(1):709–709. ISSN 2041-1723.
- 479 Zeldenrust F, Gutkin B, Denève S (2021) Efficient and robust coding in heterogeneous recurrent  
480 networks. *PLOS Computational Biology* 17(4): e1008673. <https://doi.org/10.1371/journal.pcbi.1008673>
- 481 Zoph, B., & Le, Q. (2016). Neural Architecture Search with Reinforcement Learning.  
482 <https://arxiv.org/abs/1611.01578>

## 483 **Appendix**

- 484 The full code repository, containing all training, analysis, and visualization code can be found here:  
485 <https://github.com/briardoty/allen-inst-cell-types>
